# Supplementary material for: Synthesis and optical spectroscopy of Na3Y(VO4)2:Eu3+ phosphors for thermometry and display applications
Source: Royal Society of Chemistry journal article supplement (doi:10.1039/d2ra00539e), 2022-01-01
Supplement: d2ra00539e1.pdf [file d2ra00539e1.pdf]

## Electronic Supplementary Material (ESI)

### Synthesis and optical spectroscopies of $\text{Eu}^{3+}$ doped in $\text{Na}_3\text{Y}(\text{VO}_4)_2$ phosphors for display and thermometry applications

**Ikhlas. Kachou**<sup>(a)</sup>, **Kamel. Saidi**<sup>(a)</sup>, **Rached. Salhi**<sup>(b,c)</sup>, **Mohamed. Dammak**<sup>(a)</sup>

(a) Laboratoire de Physique Appliquée, Groupe de Physique des Matériaux Luminescents, Faculté des Sciences de Sfax, Département de Physique, BP 1171, Université de Sfax, 3018, Sfax, Tunisia.

(b) Laboratory of Advanced Materials, National School of Engineers of Sfax, Sfax University, 3018 Sfax, Tunisia

(c) Univ Grenoble Alpes, CNRS, Grenoble INP, LMGP, Grenoble France Institute of Engineering Univ, Grenoble, 38000, France

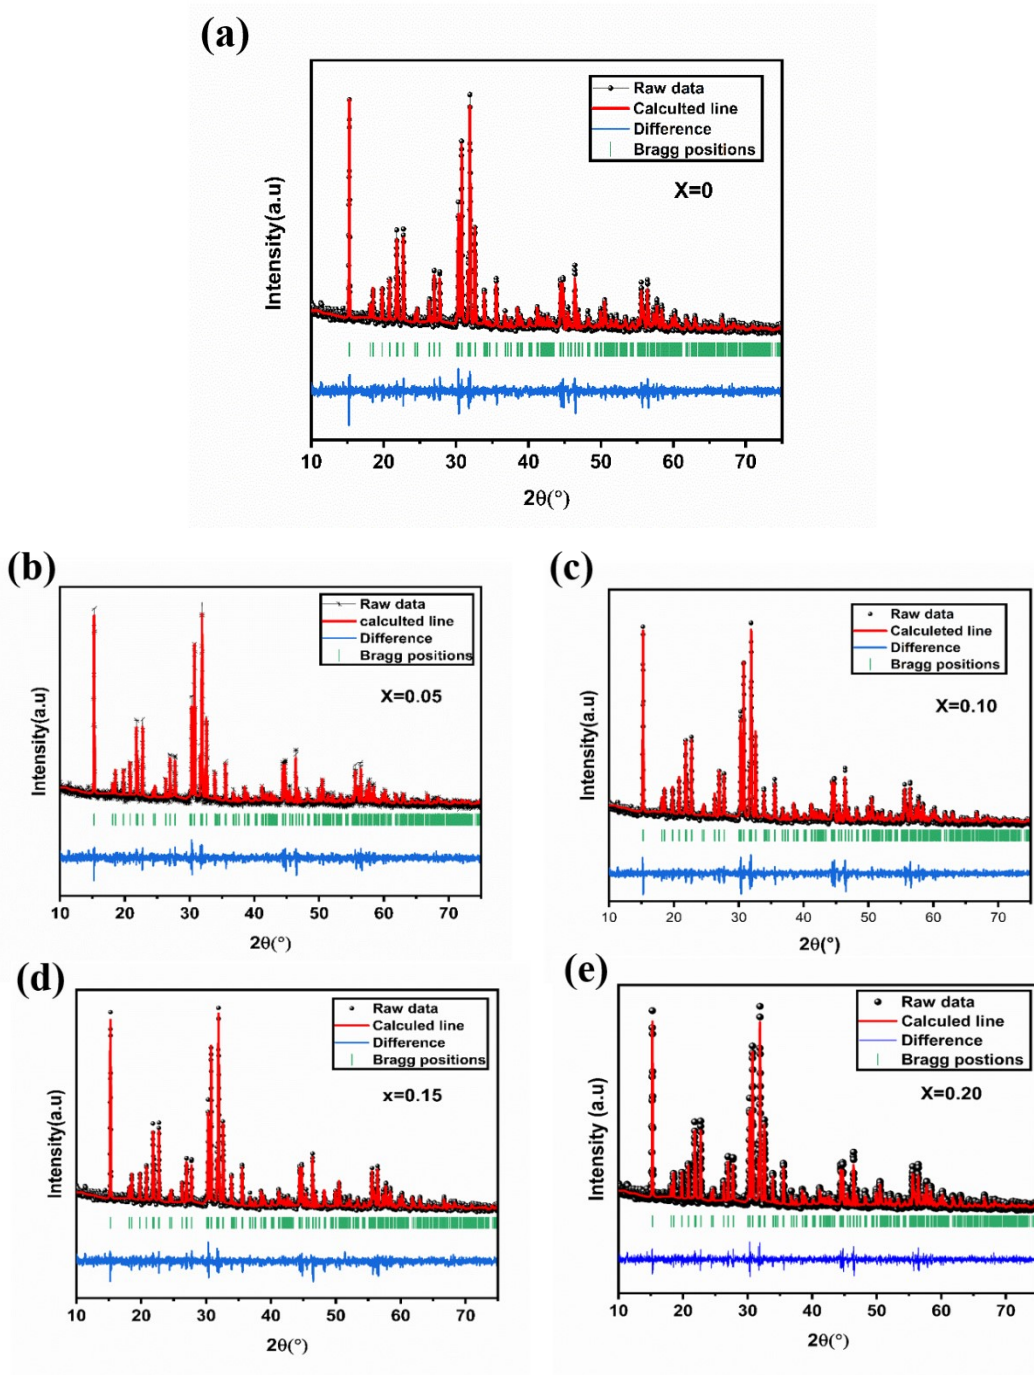

**Fig S1 : S1 (a-e):** The Rietveld structure refinement results of NYVO: $x\text{Eu}^{3+}$  ( $x = 0.00, 0.05, 0.10, 0.15$  and  $0.2$ ) phosphors

**Table S1** : 1 The unit cell parameters and volume of  $\text{Na}_3\text{Y}(\text{VO}_4)_2: x \text{Eu}^{3+}$  ( $x = 0, 0.05, 0.10, 0.15, 0.20$ ).

|         | $a$ (Å) | $b$ (Å) | $c$ (Å) | $\beta$ (°) | Unit cell volume (Å <sup>3</sup> ) | $R_{\text{WP}}$ (weighted profile factor) | $\chi^2$ |
|---------|---------|---------|---------|-------------|------------------------------------|-------------------------------------------|----------|
| X=0     | 7.2342  | 9.7645  | 5.5034  | 92.9904     | 388.2217                           | 9.89                                      | 1.97     |
| X=0.05  | 7.2273  | 9.7671  | 5.5097  | 93.0218     | 388.3876                           | 10.82                                     | 1.89     |
| X= 0.10 | 7.2168  | 9.7698  | 5.5134  | 93.0350     | 388.1863                           | 9.96                                      | 2.11     |
| X=0.15  | 7.2105  | 9.7783  | 5.5208  | 93.0366     | 388.7053                           | 10.14                                     | 2.07     |
| X= 0.20 | 7.2088  | 9.7874  | 5.5301  | 93.0467     | 388.6269                           | 10.39                                     | 2.15     |

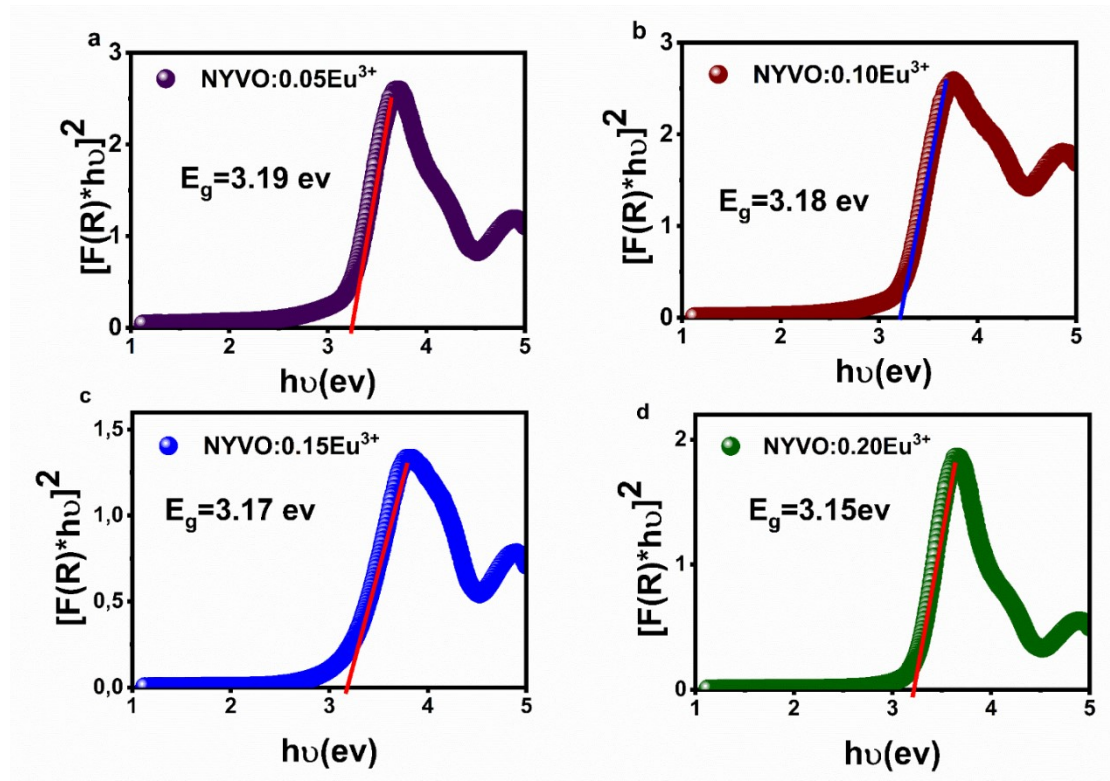

**Fig S2:** Plot of  $[F(R) \times hv]^2$  versus  $h\nu$  for the band gap energy of NYVO: $x\text{Eu}^{3+}$

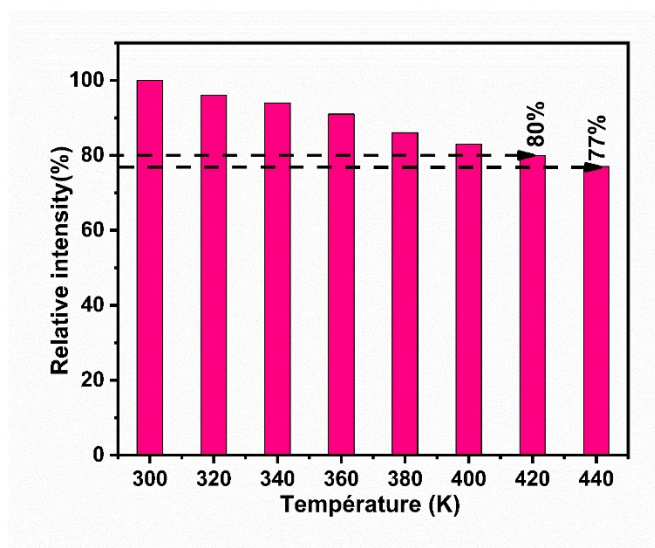

**Fig S3:** The normalized PL intensity as a function of temperature

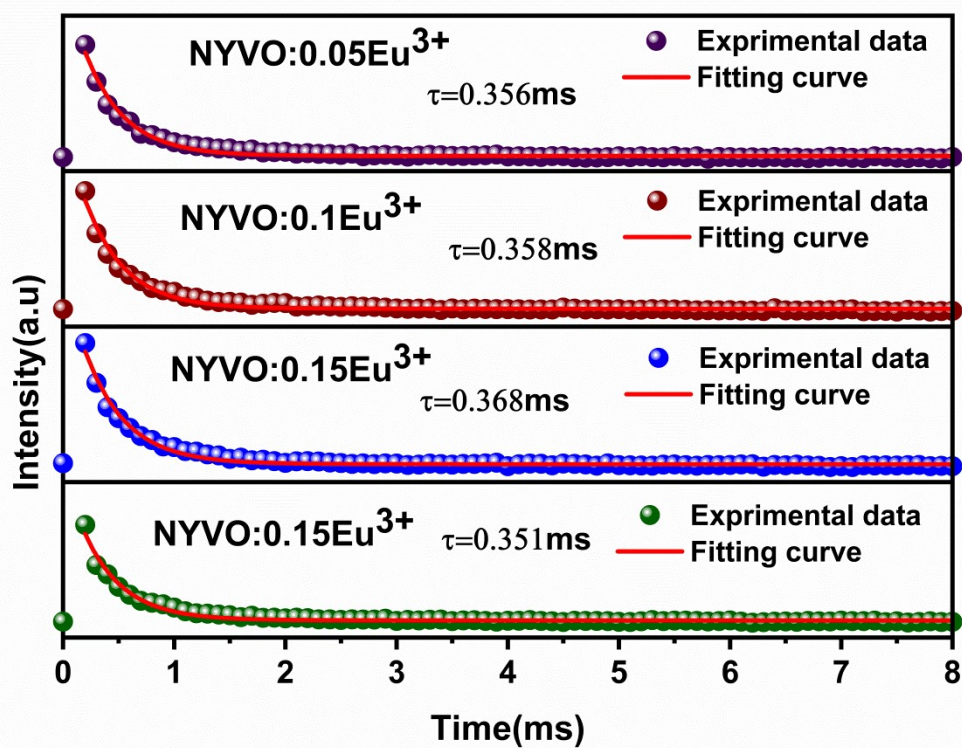

**Fig S4:** Decay curves of 615 nm emissions of NYVO: $x\text{Eu}^{3+}$  ( $X=0.05, 0.1, 0.15$  and  $0.2$ ) sample ( $\lambda_{\text{ex}}=395\text{nm}$ )
